# Supplementary material for: Attributed causes of excess mortality during the COVID-19 pandemic in a south Indian city
Source: PubMed Central journal article supplement (PMC10272147; doi:10.1038/s41467-023-39322-7), 2023-06-15
Supplement: 41467_2023_39322_MOESM1_ESM.pdf [file 41467_2023_39322_MOESM1_ESM.pdf]

## Supporting information

Attributed causes of excess mortality during the COVID-19 pandemic in a south Indian city

Joseph A. Lewnard<sup>1,2,3,\*</sup>, Chandra Mohan B.<sup>4</sup>, Gagandeep Kang<sup>5</sup>, Ramanan Laxminarayan<sup>6,7</sup>

1. Division of Epidemiology, School of Public Health, University of California, Berkeley, Berkeley, California, United States
2. Division of Infectious Diseases & Vaccinology, School of Public Health, University of California, Berkeley, Berkeley, California, United States
3. Center for Computational Biology, College of Engineering, University of California, Berkeley, Berkeley, California, United States
4. Government of Tamil Nadu, Chennai, India
5. Christian Medical College, Vellore, India
6. One Health Trust, Bangalore, India
7. Princeton University, Princeton, New Jersey, United States

## Contents of this supplement

| Item      | Title                                                                                                                                                                    | Page |
|-----------|--------------------------------------------------------------------------------------------------------------------------------------------------------------------------|------|
| Table S1  | Excess deaths, relative to continuation of 2018-19 pattern, during control period (1 March to 23 March, 2020).                                                           | 2    |
| Table S2  | Excess mortality by healthcare facility or community setting.                                                                                                            | 3    |
| Table S3  | Excess deaths, relative to continuation of 2018-19 pattern—Males.                                                                                                        | 4    |
| Table S4  | Excess deaths, relative to continuation of 2018-19 pattern—Females.                                                                                                      | 5    |
| Table S5  | Comparison of attributed causes of death during the pre-pandemic period to verbal autopsy-based estimates for all of India, 2017-2019, by age and sex.                   | 6    |
| Table S6  | Comparison of attributed causes of death during the pre-pandemic period to verbal autopsy-based estimates, for adults aged 15-69 years in low-mortality districts, 2014. | 7    |
| Table S7  | Excess deaths by attributed cause—Control period (1 March–23 March, 2020).                                                                                               | 8    |
| Table S8  | Excess deaths by attributed cause— Early lockdown (24 March–31 May, 2020).                                                                                               | 9    |
| Table S9  | Excess deaths by attributed cause—Wave 1 (1 June–30 September, 2020).                                                                                                    | 10   |
| Table S10 | Excess deaths by attributed cause—Wave 2 (16 March–15 July, 2021).                                                                                                       | 11   |
| Table S11 | Excess deaths by attributed cause—Deaths occurring in healthcare facilities during the total pandemic period (1 March, 2020–31 July, 2021).                              | 12   |
| Table S12 | Excess deaths by attributed cause—Deaths occurring in the community during the total pandemic period (1 March, 2020–31 July, 2021).                                      | 13   |
| Table S13 | Reported causes of death among individuals with or without documented SARS-CoV-2 infection.                                                                              | 14   |
| Table S14 | Association of ward-level characteristics with deprivation index.                                                                                                        | 15   |
| Table S15 | Association of cause-specific excess deaths with ward-level deprivation index.                                                                                           | 16   |
| Table S16 | Association of the proportion of excess deaths attributed to COVID-19 with ward-level deprivation index.                                                                 | 17   |
| Table S17 | Data elements of the medical certificate of cause of death for hospitalized patients (Form 4) and non-institutional deaths (Form 4A).                                    | 18   |
| Table S18 | Data elements of the death registration form.                                                                                                                            | 19   |
| Table S19 | Expected annual rates of change in age- and sex-specific population sizes.                                                                                               | 20   |
| Figure S1 | Observed and expected mortality across age- and sex-specific strata.                                                                                                     | 21   |
| Figure S2 | Association of excess deaths with specific ward-level deprivation indicators                                                                                             | 22   |

**Table S1: Excess deaths, relative to continuation of 2018-19 pattern, during control period (1 March to 23 March, 2020).**

| Stratum           | Age group       | Predicted (95% UI)    | Observed   | Excess deaths (95% UI) | Excess mortality ratio (95% UI) |
|-------------------|-----------------|-----------------------|------------|------------------------|---------------------------------|
| All deaths        |                 |                       |            |                        |                                 |
|                   | 0-9 years       | 9 (3, 23)             | 9          | 0 (-14, 6)             | 1.05 (0.38, 3.39)               |
|                   | 10-19 years     | 5 (2, 14)             | 11         | 6 (-3, 9)              | 2.09 (0.77, 6.34)               |
|                   | 20-29 years     | 23 (10, 50)           | 14         | -9 (-36, 4)            | 0.61 (0.28, 1.45)               |
|                   | 30-39 years     | 25 (14, 42)           | 36         | 11 (-6, 22)            | 1.45 (0.85, 2.52)               |
|                   | 40-49 years     | 61 (39, 92)           | 53         | -8 (-39, 14)           | 0.87 (0.58, 1.35)               |
|                   | 50-59 years     | 97 (70, 133)          | 92         | -5 (-41, 22)           | 0.95 (0.69, 1.32)               |
|                   | 60-69 years     | 150 (115, 194)        | 138        | -12 (-56, 23)          | 0.92 (0.71, 1.20)               |
|                   | 70-79 years     | 161 (127, 204)        | 175        | 14 (-29, 48)           | 1.09 (0.86, 1.38)               |
|                   | ≥80 years       | 102 (77, 134)         | 135        | 33 (1, 58)             | 1.32 (1.00, 1.75)               |
|                   | <b>All ages</b> | <b>624 (552, 704)</b> | <b>663</b> | <b>39 (-41, 111)</b>   | <b>1.06 (0.94, 1.20)</b>        |
| Male deaths       |                 |                       |            |                        |                                 |
|                   | 0-9 years       | 5 (1, 18)             | 5          | 0 (-13, 4)             | 1.09 (0.28, 6.06)               |
|                   | 10-19 years     | 3 (1, 10)             | 8          | 5 (-2, 7)              | 2.83 (0.81, 11.35)              |
|                   | 20-29 years     | 15 (4, 41)            | 8          | -7 (-33, 4)            | 0.54 (0.20, 1.80)               |
|                   | 30-39 years     | 16 (8, 30)            | 26         | 10 (-4, 18)            | 1.64 (0.87, 3.21)               |
|                   | 40-49 years     | 35 (20, 60)           | 33         | -2 (-27, 13)           | 0.93 (0.55, 1.63)               |
|                   | 50-59 years     | 58 (38, 87)           | 56         | -2 (-31, 18)           | 0.96 (0.64, 1.47)               |
|                   | 60-69 years     | 87 (61, 122)          | 80         | -7 (-42, 19)           | 0.92 (0.65, 1.31)               |
|                   | 70-79 years     | 87 (64, 118)          | 108        | 21 (-10, 44)           | 1.25 (0.92, 1.70)               |
|                   | ≥80 years       | 51 (34, 75)           | 69         | 18 (-6, 35)            | 1.36 (0.92, 2.01)               |
|                   | <b>All ages</b> | <b>353 (301, 413)</b> | <b>393</b> | <b>40 (-20, 92)</b>    | <b>1.11 (0.95, 1.31)</b>        |
| Female deaths     |                 |                       |            |                        |                                 |
|                   | 0-9 years       | 4 (0, 16)             | 4          | 0 (-12, 4)             | 1.11 (0.25, 9.75)               |
|                   | 10-19 years     | 2 (0, 13)             | 3          | 1 (-10, 3)             | 1.38 (0.23, ∞)                  |
|                   | 20-29 years     | 8 (2, 25)             | 6          | -2 (-19, 4)            | 0.79 (0.24, 3.54)               |
|                   | 30-39 years     | 9 (3, 23)             | 10         | 1 (-13, 7)             | 1.15 (0.44, 3.46)               |
|                   | 40-49 years     | 25 (12, 48)           | 20         | -5 (-28, 8)            | 0.81 (0.42, 1.67)               |
|                   | 50-59 years     | 38 (22, 63)           | 36         | -2 (-27, 14)           | 0.94 (0.57, 1.61)               |
|                   | 60-69 years     | 63 (41, 93)           | 58         | -5 (-35, 17)           | 0.93 (0.62, 1.41)               |
|                   | 70-79 years     | 74 (50, 107)          | 67         | -7 (-40, 17)           | 0.91 (0.62, 1.33)               |
|                   | ≥80 years       | 51 (34, 75)           | 66         | 15 (-9, 32)            | 1.29 (0.88, 1.94)               |
|                   | <b>All ages</b> | <b>270 (223, 325)</b> | <b>270</b> | <b>0 (-55, 47)</b>     | <b>1.00 (0.83, 1.21)</b>        |
| Deaths by setting |                 |                       |            |                        |                                 |
|                   | Facility        | 197 (158, 244)        | 206        | 9 (-38, 48)            | 1.05 (0.84, 1.31)               |
|                   | Community       | 426 (368, 493)        | 457        | 31 (-36, 89)           | 1.07 (0.93, 1.24)               |

UI: Uncertainty interval.

Excess deaths are estimated via the difference between observed deaths during 2020-21 and expected deaths for the same periods based on observations in 2018-19, accounting for projected changes in population size. Excess mortality ratios and expected mortality in the pandemic period are computed via Poisson regression models fitted to pre-pandemic (2018-19) and pandemic period (2020-21) observations, accounting for expected changes in population sizes (**Table S17**) via log offset terms. Bold text indicates totals across rows.

**Table S2: Excess mortality by healthcare facility or community setting.**

| Period                                    | Setting   | Predicted (95% UI)  | Observed | Excess deaths (95% UI) | Excess mortality ratio (95% UI) |
|-------------------------------------------|-----------|---------------------|----------|------------------------|---------------------------------|
| Total period (1 March 2020–31 July, 2021) | Facility  | 5147 (4917, 5387)   | 5866     | 719 (479, 949)         | 1.14 (1.09, 1.19)               |
|                                           | Community | 10228 (9923, 10543) | 14138    | 3910 (3595, 4215)      | 1.38 (1.34, 1.42)               |
| Early lockdown (24 March–31 May, 2020)    | Facility  | 667 (578, 768)      | 445      | -222 (-323, -133)      | 0.67 (0.58, 0.77)               |
|                                           | Community | 1342 (1235, 1457)   | 1423     | 81 (-34, 188)          | 1.06 (0.98, 1.15)               |
| Wave 1 (1 June–30 September, 2020)        | Facility  | 1107 (1013, 1211)   | 1230     | 123 (19, 217)          | 1.11 (1.02, 1.21)               |
|                                           | Community | 2207 (2091, 2329)   | 3718     | 1511 (1389, 1627)      | 1.68 (1.60, 1.78)               |
| Wave 2 (16 March–15 July, 2021)           | Facility  | 1141 (1061, 1225)   | 2225     | 1084 (1000, 1164)      | 1.95 (1.82, 2.10)               |
|                                           | Community | 2309 (2193, 2432)   | 4160     | 1851 (1728, 1967)      | 1.80 (1.71, 1.90)               |

UI: Uncertainty interval.

Excess deaths are estimated via the difference between observed deaths during 2020-21 and expected deaths for the same periods based on observations in 2018-19, accounting for projected changes in population size. Excess mortality ratios and expected mortality in the pandemic period are computed via Poisson regression models fitted to pre-pandemic (2018-19) and pandemic period (2020-21) observations, accounting for expected changes in population sizes (**Table S17**) via log offset terms.

**Table S3: Excess deaths, relative to continuation of 2018-19 pattern—Males.**

| Period                                    | Age group       | Predicted (95% UI)          | Observed      | Excess deaths (95% UI)      | Excess mortality ratio (95% UI) |
|-------------------------------------------|-----------------|-----------------------------|---------------|-----------------------------|---------------------------------|
| Total period (1 March 2020–31 July, 2021) |                 |                             |               |                             |                                 |
|                                           | 0-9 years       | 135 (95, 190)               | 85            | -50 (-105, -10)             | 0.63 (0.45, 0.89)               |
|                                           | 10-19 years     | 121 (83, 173)               | 75            | -46 (-98, -8)               | 0.62 (0.43, 0.90)               |
|                                           | 20-29 years     | 278 (223, 345)              | 229           | -49 (-116, 6)               | 0.82 (0.66, 1.02)               |
|                                           | 30-39 years     | 447 (382, 522)              | 484           | 37 (-38, 102)               | 1.08 (0.93, 1.27)               |
|                                           | 40-49 years     | 969 (873, 1,075)            | 1,121         | 152 (46, 248)               | 1.16 (1.04, 1.28)               |
|                                           | 50-59 years     | 1,636 (1,511, 1,771)        | 1,999         | 363 (228, 488)              | 1.22 (1.13, 1.32)               |
|                                           | 60-69 years     | 2,192 (2,049, 2,345)        | 2,816         | 624 (471, 767)              | 1.28 (1.20, 1.37)               |
|                                           | 70-79 years     | 2,035 (1,904, 2,175)        | 3,076         | 1,041 (901, 1,172)          | 1.51 (1.41, 1.62)               |
|                                           | ≥80 years       | 1,436 (1,324, 1,556)        | 2,039         | 603 (483, 715)              | 1.42 (1.31, 1.54)               |
|                                           | <b>All ages</b> | <b>9,091 (8,797, 9,395)</b> | <b>11,924</b> | <b>2,833 (2,529, 3,127)</b> | <b>1.31 (1.27, 1.36)</b>        |
| Early lockdown (24 March–31 May, 2020)    |                 |                             |               |                             |                                 |
|                                           | 0-9 years       | 25 (5, 84)                  | 5             | -20 (-79, 0)                | 0.20 (0.06, 1.03)               |
|                                           | 10-19 years     | 17 (5, 45)                  | 8             | -9 (-37, 3)                 | 0.48 (0.18, 1.60)               |
|                                           | 20-29 years     | 28 (13, 53)                 | 20            | -8 (-33, 7)                 | 0.72 (0.37, 1.49)               |
|                                           | 30-39 years     | 67 (42, 104)                | 45            | -22 (-59, 3)                | 0.67 (0.43, 1.06)               |
|                                           | 40-49 years     | 125 (92, 167)               | 107           | -18 (-60, 15)               | 0.86 (0.64, 1.16)               |
|                                           | 50-59 years     | 213 (167, 269)              | 164           | -49 (-105, -3)              | 0.77 (0.61, 0.98)               |
|                                           | 60-69 years     | 284 (232, 344)              | 239           | -45 (-105, 7)               | 0.84 (0.69, 1.03)               |
|                                           | 70-79 years     | 259 (212, 316)              | 240           | -19 (-76, 28)               | 0.93 (0.76, 1.13)               |
|                                           | ≥80 years       | 184 (146, 229)              | 194           | 10 (-35, 48)                | 1.06 (0.85, 1.33)               |
|                                           | <b>All ages</b> | <b>1,184 (1,075, 1,304)</b> | <b>1022</b>   | <b>-162 (-282, -53)</b>     | <b>0.86 (0.78, 0.95)</b>        |
| Wave 1 (1 June–30 September, 2020)        |                 |                             |               |                             |                                 |
|                                           | 0-9 years       | 25 (13, 48)                 | 21            | -4 (-27, 8)                 | 0.83 (0.43, 1.67)               |
|                                           | 10-19 years     | 30 (13, 62)                 | 15            | -15 (-47, 2)                | 0.51 (0.24, 1.15)               |
|                                           | 20-29 years     | 70 (46, 103)                | 58            | -12 (-45, 12)               | 0.83 (0.56, 1.25)               |
|                                           | 30-39 years     | 103 (76, 138)               | 115           | 12 (-23, 39)                | 1.12 (0.84, 1.51)               |
|                                           | 40-49 years     | 225 (183, 274)              | 246           | 21 (-28, 63)                | 1.10 (0.90, 1.34)               |
|                                           | 50-59 years     | 368 (318, 426)              | 474           | 106 (48, 156)               | 1.29 (1.11, 1.49)               |
|                                           | 60-69 years     | 477 (422, 539)              | 720           | 243 (181, 298)              | 1.51 (1.34, 1.71)               |
|                                           | 70-79 years     | 430 (382, 484)              | 832           | 402 (348, 450)              | 1.93 (1.72, 2.18)               |
|                                           | ≥80 years       | 291 (252, 336)              | 574           | 283 (238, 322)              | 1.97 (1.71, 2.28)               |
|                                           | <b>All ages</b> | <b>1,988 (1,874, 2,108)</b> | <b>3055</b>   | <b>1,067 (947, 1,181)</b>   | <b>1.54 (1.45, 1.63)</b>        |
| Wave 2 (16 March–15 July, 2021)           |                 |                             |               |                             |                                 |
|                                           | 0-9 years       | 38 (17, 76)                 | 16            | -22 (-60, -1)               | 0.42 (0.21, 0.94)               |
|                                           | 10-19 years     | 26 (10, 59)                 | 12            | -14 (-47, 2)                | 0.46 (0.20, 1.17)               |
|                                           | 20-29 years     | 61 (40, 92)                 | 54            | -7 (-38, 14)                | 0.89 (0.59, 1.36)               |
|                                           | 30-39 years     | 116 (87, 151)               | 133           | 17 (-18, 46)                | 1.15 (0.88, 1.52)               |
|                                           | 40-49 years     | 220 (184, 261)              | 366           | 146 (105, 182)              | 1.67 (1.40, 1.99)               |
|                                           | 50-59 years     | 368 (322, 419)              | 660           | 292 (241, 338)              | 1.79 (1.58, 2.05)               |
|                                           | 60-69 years     | 480 (428, 536)              | 902           | 422 (366, 474)              | 1.88 (1.68, 2.11)               |
|                                           | 70-79 years     | 445 (399, 497)              | 1014          | 569 (517, 615)              | 2.28 (2.04, 2.54)               |
|                                           | ≥80 years       | 307 (268, 352)              | 634           | 327 (282, 366)              | 2.06 (1.80, 2.37)               |
|                                           | <b>All ages</b> | <b>2,028 (1,920, 2,142)</b> | <b>3791</b>   | <b>1,763 (1,649, 1,871)</b> | <b>1.87 (1.77, 1.97)</b>        |

UI: Uncertainty interval.

Excess deaths are estimated via the difference between observed deaths during 2020-21 and expected deaths for the same periods based on observations in 2018-19, accounting for projected changes in population size. Excess mortality ratios and expected mortality in the pandemic period are computed via Poisson regression models fitted to pre-pandemic (2018-19) and pandemic period (2020-21) observations, accounting for expected changes in population sizes (**Table S17**) via log offset terms. Bold text indicates totals across rows.

**Table S4: Excess deaths, relative to continuation of 2018-19 pattern—Females.**

| Period                                    | Age group       | Predicted (95% UI)          | Observed     | Excess deaths (95% UI)      | Excess mortality ratio (95% UI) |
|-------------------------------------------|-----------------|-----------------------------|--------------|-----------------------------|---------------------------------|
| Total period (1 March 2020–31 July, 2021) |                 |                             |              |                             |                                 |
|                                           | 0-9 years       | 100 (68, 144)               | 77           | -23 (-67, 9)                | 0.77 (0.53, 1.13)               |
|                                           | 10-19 years     | 55 (35, 86)                 | 59           | 4 (-27, 24)                 | 1.07 (0.69, 1.68)               |
|                                           | 20-29 years     | 133 (98, 179)               | 127          | -6 (-52, 29)                | 0.95 (0.71, 1.29)               |
|                                           | 30-39 years     | 214 (168, 270)              | 207          | -7 (-63, 39)                | 0.97 (0.77, 1.23)               |
|                                           | 40-49 years     | 484 (416, 563)              | 521          | 37 (-42, 105)               | 1.08 (0.93, 1.25)               |
|                                           | 50-59 years     | 920 (829, 1,021)            | 1,173        | 253 (152, 344)              | 1.27 (1.15, 1.41)               |
|                                           | 60-69 years     | 1,483 (1,365, 1,609)        | 1,876        | 393 (267, 511)              | 1.27 (1.17, 1.37)               |
|                                           | 70-79 years     | 1,697 (1,573, 1,830)        | 2,289        | 592 (459, 716)              | 1.35 (1.25, 1.46)               |
|                                           | ≥80 years       | 1,327 (1,216, 1,446)        | 1,751        | 424 (305, 535)              | 1.32 (1.21, 1.44)               |
|                                           | <b>All ages</b> | <b>6,285 (6,040, 6,538)</b> | <b>8,080</b> | <b>1,795 (1,542, 2,040)</b> | <b>1.29 (1.24, 1.34)</b>        |
| Early lockdown (24 March–31 May, 2020)    |                 |                             |              |                             |                                 |
|                                           | 0-9 years       | 12 (5, 27)                  | 14           | 2 (-13, 9)                  | 1.16 (0.51, 2.86)               |
|                                           | 10-19 years     | 8 (2, 27)                   | 6            | -2 (-21, 4)                 | 0.71 (0.22, 3.20)               |
|                                           | 20-29 years     | 16 (6, 36)                  | 13           | -3 (-23, 7)                 | 0.81 (0.36, 2.02)               |
|                                           | 30-39 years     | 30 (15, 57)                 | 20           | -10 (-37, 5)                | 0.68 (0.35, 1.38)               |
|                                           | 40-49 years     | 65 (40, 101)                | 43           | -22 (-58, 3)                | 0.67 (0.43, 1.07)               |
|                                           | 50-59 years     | 120 (91, 157)               | 133          | 13 (-24, 42)                | 1.11 (0.85, 1.46)               |
|                                           | 60-69 years     | 189 (150, 238)              | 184          | -5 (-54, 34)                | 0.97 (0.77, 1.22)               |
|                                           | 70-79 years     | 219 (177, 269)              | 220          | 1 (-49, 43)                 | 1.00 (0.82, 1.24)               |
|                                           | ≥80 years       | 179 (144, 222)              | 213          | 34 (-9, 69)                 | 1.19 (0.96, 1.48)               |
|                                           | <b>All ages</b> | <b>825 (740, 918)</b>       | <b>846</b>   | <b>21 (-72, 106)</b>        | <b>1.03 (0.92, 1.14)</b>        |
| Wave 1 (1 June–30 September, 2020)        |                 |                             |              |                             |                                 |
|                                           | 0-9 years       | 23 (9, 53)                  | 12           | -11 (-41, 3)                | 0.52 (0.23, 1.33)               |
|                                           | 10-19 years     | 12 (3, 35)                  | 7            | -5 (-28, 4)                 | 0.59 (0.20, 2.22)               |
|                                           | 20-29 years     | 23 (12, 41)                 | 27           | 4 (-14, 15)                 | 1.19 (0.66, 2.24)               |
|                                           | 30-39 years     | 43 (27, 68)                 | 47           | 4 (-21, 20)                 | 1.08 (0.69, 1.74)               |
|                                           | 40-49 years     | 107 (80, 141)               | 126          | 19 (-15, 46)                | 1.18 (0.89, 1.57)               |
|                                           | 50-59 years     | 199 (162, 243)              | 249          | 50 (6, 87)                  | 1.25 (1.02, 1.53)               |
|                                           | 60-69 years     | 313 (268, 364)              | 450          | 137 (86, 182)               | 1.44 (1.24, 1.68)               |
|                                           | 70-79 years     | 358 (311, 411)              | 554          | 196 (143, 243)              | 1.55 (1.35, 1.78)               |
|                                           | ≥80 years       | 273 (232, 320)              | 421          | 148 (101, 189)              | 1.54 (1.32, 1.81)               |
|                                           | <b>All ages</b> | <b>1,326 (1,231, 1,429)</b> | <b>1,893</b> | <b>567 (464, 662)</b>       | <b>1.43 (1.33, 1.54)</b>        |
| Wave 2 (16 March–15 July, 2021)           |                 |                             |              |                             |                                 |
|                                           | 0-9 years       | 22 (10, 44)                 | 17           | -5 (-27, 7)                 | 0.78 (0.38, 1.71)               |
|                                           | 10-19 years     | 13 (6, 27)                  | 20           | 7 (-7, 14)                  | 1.52 (0.75, 3.25)               |
|                                           | 20-29 years     | 29 (17, 48)                 | 37           | 8 (-11, 20)                 | 1.28 (0.77, 2.22)               |
|                                           | 30-39 years     | 52 (35, 77)                 | 65           | 13 (-12, 30)                | 1.25 (0.85, 1.87)               |
|                                           | 40-49 years     | 109 (85, 139)               | 172          | 63 (33, 87)                 | 1.58 (1.23, 2.04)               |
|                                           | 50-59 years     | 204 (171, 242)              | 388          | 184 (146, 217)              | 1.90 (1.61, 2.26)               |
|                                           | 60-69 years     | 328 (286, 376)              | 606          | 278 (230, 320)              | 1.85 (1.61, 2.12)               |
|                                           | 70-79 years     | 379 (335, 428)              | 783          | 404 (355, 448)              | 2.07 (1.83, 2.34)               |
|                                           | ≥80 years       | 313 (270, 362)              | 506          | 193 (144, 236)              | 1.61 (1.40, 1.87)               |
|                                           | <b>All ages</b> | <b>1,421 (1,331, 1,518)</b> | <b>2,594</b> | <b>1,173 (1,076, 1,263)</b> | <b>1.82 (1.71, 1.95)</b>        |

UI: Uncertainty interval.

Excess deaths are estimated via the difference between observed deaths during 2020-21 and expected deaths for the same periods based on observations in 2018-19, accounting for projected changes in population size. Excess mortality ratios and expected mortality in the pandemic period are computed via Poisson regression models fitted to pre-pandemic (2018-19) and pandemic period (2020-21) observations, accounting for expected changes in population sizes (**Table S17**) via log offset terms. Bold text indicates totals across rows.

**Table S5: Comparison of attributed causes of death during the pre-pandemic period to verbal autopsy-based estimates for all of India, 2017-2019, by age and sex.**

| Age group | Attributed cause                                                   | All, %      |             | Males, % |             | Females, % |             |
|-----------|--------------------------------------------------------------------|-------------|-------------|----------|-------------|------------|-------------|
|           |                                                                    | Observed    | SRS 2017-19 | Observed | SRS 2017-19 | Observed   | SRS 2017-19 |
| 0-4y      | Infections (other than COVID-19), perinatal, and maternal diseases | 25.0        | 83.6        | 24.4     | 82.6        | 25.7       | 84.7        |
|           | Noncommunicable diseases                                           | 21.9        | 10.1        | 22.2     | 10.7        | 21.4       | 9.5         |
|           | Injuries                                                           | 5.7         | 4.9         | 6.7      | 5.1         | 4.3        | 4.7         |
|           | Uncategorized (including senility)                                 | 47.5        | 1.4         | 46.7     | 1.6         | 48.6       | 1.2         |
|           | <b>Proportion of all deaths belonging to age group</b>             | <b>1.0</b>  | <b>4.3</b>  |          |             |            |             |
| 5-14y     | Infections (other than COVID-19), perinatal, and maternal diseases | 18.6        | 38.2        | 18.8     | 34.4        | 18.4       | 42.8        |
|           | Noncommunicable diseases                                           | 29.5        | 25.0        | 28.8     | 23.1        | 30.6       | 27.1        |
|           | Injuries                                                           | 11.6        | 33.5        | 10.0     | 39.6        | 14.3       | 26.3        |
|           | Uncategorized (including senility)                                 | 40.3        | 3.3         | 42.5     | 2.9         | 36.7       | 3.7         |
|           | <b>Proportion of all deaths belonging to age group</b>             | <b>0.8</b>  | <b>0.8</b>  |          |             |            |             |
| 15-29y    | Infections (other than COVID-19), perinatal, and maternal diseases | 4.7         | 19.8        | 3.8      | 14.0        | 6.4        | 28.9        |
|           | Noncommunicable diseases                                           | 27.2        | 29.5        | 27.3     | 28.1        | 26.9       | 31.5        |
|           | Injuries                                                           | 44.3        | 47.1        | 48.1     | 54.7        | 36.3       | 35.3        |
|           | Uncategorized (including senility)                                 | 23.8        | 3.6         | 20.8     | 3.2         | 30.4       | 4.2         |
|           | <b>Proportion of all deaths belonging to age group</b>             | <b>3.5</b>  | <b>5.5</b>  |          |             |            |             |
| 30-44y    | Infections (other than COVID-19), perinatal, and maternal diseases | 3.8         | 14.3        | 3.5      | 12.1        | 4.3        | 19.5        |
|           | Noncommunicable diseases                                           | 57.6        | 55.4        | 56.2     | 54.0        | 60.5       | 58.6        |
|           | Injuries                                                           | 16.1        | 28.0        | 19.2     | 31.9        | 9.6        | 19.1        |
|           | Uncategorized (including senility)                                 | 22.6        | 2.3         | 21.2     | 2.0         | 25.5       | 2.8         |
|           | <b>Proportion of all deaths belonging to age group</b>             | <b>8.4</b>  | <b>2.4</b>  |          |             |            |             |
| 45-54y    | Infections (other than COVID-19), perinatal, and maternal diseases | 3.7         | 12.2        | 3.7      | 11.1        | 3.8        | 14.4        |
|           | Noncommunicable diseases                                           | 71.6        | 72.7        | 69.9     | 71.9        | 74.7       | 74.3        |
|           | Injuries                                                           | 5.8         | 12.9        | 7.4      | 15.0        | 2.9        | 8.5         |
|           | Uncategorized (including senility)                                 | 18.9        | 2.2         | 19.0     | 1.9         | 18.6       | 2.7         |
|           | <b>Proportion of all deaths belonging to age group</b>             | <b>12.5</b> | <b>6.6</b>  |          |             |            |             |
| 55-69y    | Infections (other than COVID-19), perinatal, and maternal diseases | 2.9         | 14.7        | 2.7      | 13.5        | 3.2        | 16.6        |
|           | Noncommunicable diseases                                           | 76.2        | 74.4        | 75.5     | 75.5        | 77.2       | 72.6        |
|           | Injuries                                                           | 2.6         | 6.1         | 3.2      | 6.9         | 1.6        | 4.9         |
|           | Uncategorized (including senility)                                 | 18.4        | 4.8         | 18.7     | 4.0         | 18.0       | 5.9         |
|           | <b>Proportion of all deaths belonging to age group</b>             | <b>32.6</b> | <b>10.6</b> |          |             |            |             |
| ≥70y      | Infections (other than COVID-19), perinatal, and maternal diseases | 2.7         | 18.1        | 2.6      | 17.3        | 2.7        | 19.0        |
|           | Noncommunicable diseases                                           | 75.8        | 52.5        | 76.0     | 56.9        | 75.7       | 47.9        |
|           | Injuries                                                           | 1.2         | 3.7         | 1.5      | 3.6         | 0.9        | 3.8         |
|           | Uncategorized (including senility)                                 | 20.3        | 25.7        | 20.0     | 22.3        | 20.7       | 29.3        |
|           | <b>Proportion of all deaths belonging to age group</b>             | <b>41.1</b> | <b>40.9</b> |          |             |            |             |
| All       | Infections (other than COVID-19), perinatal, and maternal diseases | 3.4         | 21.5        | 3.3      | 19.4        | 3.6        | 24.3        |
|           | Noncommunicable diseases                                           | 71.2        | 56.0        | 70.1     | 58.3        | 72.8       | 52.7        |
|           | Injuries                                                           | 5.1         | 10.4        | 6.6      | 12.5        | 3.0        | 7.5         |
|           | Uncategorized (including senility)                                 | 20.3        | 12.2        | 20.0     | 9.7         | 20.7       | 15.5        |
|           |                                                                    |             |             |          |             |            |             |

SRS: Sample-based registration system.

SRS data based on verbal autopsies are obtained from ref. 34, India Sample-Based Registration System Bulletin 2020. Available from: <https://censusindia.gov.in/nada/index.php/catalog/42687>. Accessed 22 March, 2023. Bold text indicates totals across rows.

**Table S6: Comparison of attributed causes of death during the pre-pandemic period to verbal autopsy-based estimates, for adults aged 15-69 years in low-mortality districts, 2014.**

| Age group | Attributed cause                                                   | All, %   |                         | Males, % |                         | Females, % |                         |
|-----------|--------------------------------------------------------------------|----------|-------------------------|----------|-------------------------|------------|-------------------------|
|           |                                                                    | Observed | Low-mortality districts | Observed | Low-mortality districts | Observed   | Low-mortality districts |
| All 15-69 |                                                                    |          |                         |          |                         |            |                         |
|           | Infections (other than COVID-19), perinatal, and maternal diseases | 3.3      | 19.4                    | 3.1      | 19.1                    | 3.6        | 19.9                    |
|           | Noncommunicable diseases                                           | 69.4     | 60.5                    | 68.0     | 59.8                    | 71.8       | 61.5                    |
|           | Injuries                                                           | 7.8      | 15.5                    | 9.7      | 17.3                    | 4.8        | 12.7                    |
|           | Uncategorized (including senility)                                 | 19.4     | 4.6                     | 19.3     | 3.8                     | 19.8       | 6.0                     |

Data on attributed causes of death across low-mortality districts based on verbal autopsies are obtained from ref. 35, Ram, U. *et al.* Age-specific and sex-specific adult mortality risk in India in 2014: analysis of 0.27 million nationally surveyed deaths and demographic estimates from 597 districts. *Lancet Global Health* 3, e767–e775 (2015).

**Table S7: Excess deaths by attributed cause—Control period (1 March–23 March, 2020).**

| Attributed cause                                       | Predicted (95% UI) | Observed | Excess deaths (95% UI) | Excess mortality ratio (95% UI) |
|--------------------------------------------------------|--------------------|----------|------------------------|---------------------------------|
| Infections (other than COVID-19) and maternal diseases | 21 (0, 100)        | 3        | -18 (-97, 3)           | 0.14 (0.03, ∞)                  |
| Noncommunicable diseases                               | 435 (377, 499)     | 503      | 68 (4, 126)            | 1.16 (1.01, 1.33)               |
| Injuries                                               | 35 (21, 58)        | 38       | 3 (-20, 17)            | 1.07 (0.65, 1.81)               |
| Senility                                               | 21 (11, 38)        | 28       | 7 (-10, 17)            | 1.31 (0.73, 2.46)               |
| Other unclassified causes                              | 108 (78, 147)      | 91       | -17 (-56, 13)          | 0.85 (0.62, 1.17)               |

UI: Uncertainty interval.

Excess deaths are estimated via the difference between observed deaths during 2020-21 and expected deaths for the same periods based on observations in 2018-19, accounting for projected changes in population size. Excess mortality ratios and expected mortality in the pandemic period are computed via Poisson regression models fitted to pre-pandemic (2018-19) and pandemic period (2020-21) observations, accounting for expected changes in population sizes (**Table S17**) via log offset terms.



**Table S8: Excess deaths by attributed cause— Early lockdown (24 March–31 May, 2020).**

| Cause                                                  | Predicted (95% UI)          | Observed     | Excess deaths (95% UI) | Excess mortality ratio (95% UI) |
|--------------------------------------------------------|-----------------------------|--------------|------------------------|---------------------------------|
| Infections (other than COVID-19) and maternal diseases |                             |              |                        |                                 |
| Lower respiratory tract infections                     | 32 (10, 85)                 | 8            | -24 (-77, -2)          | 0.25 (0.09, 0.81)               |
| Tuberculosis                                           | 6 (1, 21)                   | 5            | -1 (-16, 4)            | 0.89 (0.24, 4.87)               |
| Diarrhea and gastrointestinal infections               | 3 (0, 15)                   | 3            | 0 (-12, 3)             | 1.13 (0.20, ∞)                  |
| Syphilis and other genitourinary diseases              | 3 (0, 22)                   | 2            | -1 (-20, 2)            | 0.69 (0.09, ∞)                  |
| Other infectious diseases                              | 0 (0, 0)                    | 0            | 0 (0, 0)               | --                              |
| Maternal and perinatal diseases                        | 1 (0, 19)                   | 1            | 0 (-18, 1)             | 1.26 (0.05, ∞)                  |
| <b>Total</b>                                           | <b>49 (24, 92)</b>          | <b>19</b>    | <b>-30 (-73, -5)</b>   | <b>0.39 (0.21, 0.81)</b>        |
| Noncommunicable diseases                               |                             |              |                        |                                 |
| Cardiovascular/cerebrovascular conditions              | 1,146 (1,047, 1,252)        | 1,221        | 75 (-31, 174)          | 1.07 (0.97, 1.17)               |
| Chronic liver disease                                  | 57 (25, 120)                | 14           | -43 (-106, -11)        | 0.24 (0.12, 0.57)               |
| Cancer                                                 | 89 (69, 114)                | 186          | 97 (72, 117)           | 2.09 (1.63, 2.69)               |
| Diabetes mellitus                                      | 61 (40, 91)                 | 56           | -5 (-35, 16)           | 0.92 (0.62, 1.41)               |
| Other noncommunicable diseases                         | 55 (11, 183)                | 5            | -50 (-178, -6)         | 0.09 (0.03, 0.46)               |
| <b>Total</b>                                           | <b>1,415 (1,305, 1,534)</b> | <b>1,482</b> | <b>67 (-52, 177)</b>   | <b>1.05 (0.97, 1.14)</b>        |
| Injuries                                               |                             |              |                        |                                 |
| Unintentional                                          | 83 (49, 137)                | 33           | -50 (-104, -16)        | 0.40 (0.24, 0.67)               |
| Intentional (suicide, homicide)                        | 30 (16, 55)                 | 24           | -6 (-31, 8)            | 0.80 (0.44, 1.54)               |
| <b>Total</b>                                           | <b>114 (76, 167)</b>        | <b>57</b>    | <b>-57 (-110, -19)</b> | <b>0.50 (0.34, 0.75)</b>        |
| Other or unclassified causes                           |                             |              |                        |                                 |
| Senility                                               | 54 (38, 77)                 | 81           | 27 (4, 43)             | 1.49 (1.05, 2.15)               |
| Other unclassified causes                              | 376 (308, 457)              | 229          | -147 (-228, -79)       | 0.61 (0.50, 0.74)               |
| COVID-19                                               | 0                           | 0            | --                     | --                              |

UI: Uncertainty interval.

Excess deaths are estimated via the difference between observed deaths during 2020-21 and expected deaths for the same periods based on observations in 2018-19, accounting for projected changes in population size. Excess mortality ratios and expected mortality in the pandemic period are computed via Poisson regression models fitted to pre-pandemic (2018-19) and pandemic period (2020-21) observations, accounting for expected changes in population sizes (**Table S17**) via log offset terms. Bold text indicates totals across rows.

**Table S9: Excess deaths by attributed cause—Wave 1 (1 June–30 September, 2020).**

| Cause                                                  | Predicted (95% UI)          | Observed     | Excess deaths (95% UI)      | Excess mortality ratio (95% UI) |
|--------------------------------------------------------|-----------------------------|--------------|-----------------------------|---------------------------------|
| Infections (other than COVID-19) and maternal diseases |                             |              |                             |                                 |
| Lower respiratory tract infections                     | 49 (28, 84)                 | 29           | -20 (-55, 1)                | 0.59 (0.34, 1.05)               |
| Tuberculosis                                           | 10 (3, 30)                  | 7            | -3 (-23, 4)                 | 0.69 (0.23, 2.66)               |
| Diarrhea and gastrointestinal infections               | 8 (2, 30)                   | 5            | -3 (-25, 3)                 | 0.59 (0.16, 3.19)               |
| Syphilis and other genitourinary diseases              | 6 (2, 19)                   | 7            | 1 (-12, 5)                  | 1.12 (0.36, 4.40)               |
| Other infectious diseases                              | 0 (0, 0)                    | 0            | 0 (0, 0)                    | --                              |
| Maternal and perinatal diseases                        | 0 (0, 10)                   | 1            | 1 (-9, 1)                   | 4.64 (0.10, ∞)                  |
| <b>Total</b>                                           | <b>85 (55, 129)</b>         | <b>49</b>    | <b>-36 (-80, -6)</b>        | <b>0.58 (0.38, 0.89)</b>        |
| Noncommunicable diseases                               |                             |              |                             |                                 |
| Cardiovascular/cerebrovascular conditions              | 2009 (1895, 2128)           | 3203         | 1194 (1075, 1308)           | 1.59 (1.51, 1.69)               |
| Chronic liver disease                                  | 117 (72, 184)               | 38           | -79 (-146, -34)             | 0.32 (0.21, 0.53)               |
| Cancer                                                 | 236 (196, 285)              | 284          | 48 (-1, 88)                 | 1.20 (1.00, 1.45)               |
| Diabetes mellitus                                      | 82 (62, 108)                | 145          | 63 (37, 83)                 | 1.76 (1.34, 2.33)               |
| Other noncommunicable diseases                         | 25 (9, 58)                  | 11           | -14 (-47, 2)                | 0.44 (0.19, 1.18)               |
| <b>Total</b>                                           | <b>2,472 (2,344, 2,607)</b> | <b>3,681</b> | <b>1,209 (1,074, 1,337)</b> | <b>1.49 (1.41, 1.57)</b>        |
| Injuries and accidents                                 |                             |              |                             |                                 |
| Unintentional                                          | 110 (78, 153)               | 79           | -31 (-74, 1)                | 0.72 (0.51, 1.02)               |
| Intentional (suicide, homicide)                        | 59 (41, 85)                 | 76           | 17 (-9, 35)                 | 1.28 (0.89, 1.87)               |
| <b>Total</b>                                           | <b>170 (132, 217)</b>       | <b>155</b>   | <b>-15 (-62, 23)</b>        | <b>0.91 (0.72, 1.17)</b>        |
| Other or unclassified causes                           |                             |              |                             |                                 |
| Senility                                               | 86 (67, 109)                | 211          | 125 (102, 144)              | 2.47 (1.94, 3.14)               |
| Other unclassified causes                              | 501 (436, 574)              | 525          | 24 (-49, 89)                | 1.05 (0.92, 1.20)               |
| COVID-19                                               | 0                           | 327          | 327                         | --                              |

UI: Uncertainty interval.

Excess deaths are estimated via the difference between observed deaths during 2020-21 and expected deaths for the same periods based on observations in 2018-19, accounting for projected changes in population size. Excess mortality ratios and expected mortality in the pandemic period are computed via Poisson regression models fitted to pre-pandemic (2018-19) and pandemic period (2020-21) observations, accounting for expected changes in population sizes (**Table S17**) via log offset terms. Bold text indicates totals across rows.

**Table S10: Excess deaths by attributed cause—Wave 2 (16 March–15 July, 2021).**

| Attributed cause                                       | Predicted (95% UI)          | Observed     | Excess deaths (95% UI) | Excess mortality ratio (95% UI) |
|--------------------------------------------------------|-----------------------------|--------------|------------------------|---------------------------------|
| Infections (other than COVID-19) and maternal diseases |                             |              |                        |                                 |
| Lower respiratory tract infections                     | 60 (43, 84)                 | 101          | 41 (17, 58)            | 1.67 (1.21, 2.34)               |
| Tuberculosis                                           | 10 (4, 25)                  | 12           | 2 (-13, 8)             | 1.17 (0.48, 3.15)               |
| Diarrhea and gastrointestinal infections               | 6 (0, 41)                   | 2            | -4 (-39, 2)            | 0.34 (0.05, ∞)                  |
| Syphilis and other genitourinary diseases              | 7 (1, 29)                   | 4            | -3 (-25, 3)            | 0.58 (0.14, 4.55)               |
| Other infectious diseases                              | 0 (0, 0)                    | 0            | 0 (0, 0)               | --                              |
| Maternal and perinatal diseases                        | 0 (0, 0)                    | 0            | 0 (0, 0)               | --                              |
| <b>Total</b>                                           | <b>93 (69, 124)</b>         | <b>119</b>   | <b>26 (-5, 50)</b>     | <b>1.29 (0.96, 1.73)</b>        |
| Noncommunicable diseases                               |                             |              |                        |                                 |
| Cardiovascular/cerebrovascular conditions              | 2015 (1895, 2143)           | 2720         | 705 (577, 825)         | 1.35 (1.27, 1.44)               |
| Chronic liver disease                                  | 105 (66, 162)               | 43           | -62 (-119, -23)        | 0.41 (0.27, 0.65)               |
| Cancer                                                 | 177 (132, 237)              | 101          | -76 (-136, -31)        | 0.57 (0.43, 0.77)               |
| Diabetes mellitus                                      | 103 (77, 135)               | 127          | 24 (-8, 50)            | 1.24 (0.94, 1.65)               |
| Other noncommunicable diseases                         | 76 (29, 172)                | 11           | -65 (-161, -18)        | 0.14 (0.06, 0.37)               |
| <b>Total</b>                                           | <b>2,480 (2,342, 2,628)</b> | <b>3,002</b> | <b>522 (374, 660)</b>  | <b>1.21 (1.14, 1.28)</b>        |
| Injuries                                               |                             |              |                        |                                 |
| Unintentional                                          | 140 (94, 203)               | 57           | -83 (-146, -37)        | 0.41 (0.28, 0.61)               |
| Intentional (suicide, homicide)                        | 56 (37, 82)                 | 66           | 10 (-16, 29)           | 1.19 (0.81, 1.76)               |
| <b>Total</b>                                           | <b>196 (149, 255)</b>       | <b>123</b>   | <b>-73 (-132, -26)</b> | <b>0.63 (0.48, 0.83)</b>        |
| Other or unclassified causes                           |                             |              |                        |                                 |
| Senility                                               | 96 (75, 121)                | 208          | 112 (87, 133)          | 2.17 (1.71, 2.77)               |
| Other unclassified causes                              | 584 (537, 635)              | 2127         | 1543 (1492, 1590)      | 3.64 (3.35, 3.96)               |
| COVID-19                                               | 0                           | 806          | 806                    | --                              |

UI: Uncertainty interval.

Excess deaths are estimated via the difference between observed deaths during 2020-21 and expected deaths for the same periods based on observations in 2018-19, accounting for projected changes in population size. Excess mortality ratios and expected mortality in the pandemic period are computed via Poisson regression models fitted to pre-pandemic (2018-19) and pandemic period (2020-21) observations, accounting for expected changes in population sizes (**Table S17**) via log offset terms. Bold text indicates totals across rows.

**Table S11: Excess deaths by attributed cause—Deaths occurring in healthcare facilities during the total pandemic period (1 March, 2020–31 July, 2021).**

| Attributed cause                                       | Predicted (95% UI)          | Observed     | Excess deaths (95% UI)  | Excess mortality ratio (95% UI) |
|--------------------------------------------------------|-----------------------------|--------------|-------------------------|---------------------------------|
| Infections (other than COVID-19) and maternal diseases |                             |              |                         |                                 |
| Lower respiratory tract infections                     | 204 (155, 267)              | 142          | -62 (-125, -13)         | 0.69 (0.53, 0.92)               |
| Tuberculosis                                           | 29 (11, 71)                 | 11           | -18 (-60, 0)            | 0.38 (0.16, 1.03)               |
| Diarrhea and gastrointestinal infections               | 1 (0, 29)                   | 1            | 0 (-28, 1)              | 1.02 (0.03, ∞)                  |
| Syphilis and other genitourinary diseases              | 6 (1, 30)                   | 4            | -2 (-26, 3)             | 0.63 (0.14, 5.76)               |
| Other infectious diseases                              | 0 (0, 0)                    | 0            | 0 (0, 0)                | --                              |
| Maternal and perinatal diseases                        | 2 (0, 23)                   | 2            | 0 (-21, 2)              | 0.82 (0.09, ∞)                  |
| <b>Total</b>                                           | <b>254 (197, 325)</b>       | <b>160</b>   | <b>-94 (-165, -37)</b>  | <b>0.63 (0.49, 0.81)</b>        |
| Noncommunicable diseases                               |                             |              |                         |                                 |
| Cardiovascular/cerebrovascular conditions              | 2,098 (1,946, 2,263)        | 1,997        | -101 (-266, 51)         | 0.95 (0.88, 1.03)               |
| Chronic liver disease                                  | 123 (86, 173)               | 85           | -38 (-88, -1)           | 0.69 (0.49, 0.99)               |
| Cancer                                                 | 271 (220, 333)              | 273          | 2 (-60, 53)             | 1.01 (0.82, 1.24)               |
| Diabetes mellitus                                      | 174 (134, 225)              | 175          | 1 (-50, 41)             | 1.00 (0.78, 1.30)               |
| Other noncommunicable diseases                         | 28 (14, 53)                 | 28           | 0 (-25, 14)             | 1.00 (0.53, 1.96)               |
| <b>Total</b>                                           | <b>2,696 (2,520, 2,881)</b> | <b>2,558</b> | <b>-138 (-323, 38)</b>  | <b>0.95 (0.89, 1.02)</b>        |
| Injuries                                               |                             |              |                         |                                 |
| Unintentional                                          | 313 (245, 397)              | 168          | -145 (-229, -77)        | 0.54 (0.42, 0.69)               |
| Intentional (suicide, homicide)                        | 7 (1, 25)                   | 6            | -1 (-19, 5)             | 0.91 (0.24, 4.50)               |
| <b>Total</b>                                           | <b>320 (251, 405)</b>       | <b>174</b>   | <b>-146 (-231, -77)</b> | <b>0.54 (0.43, 0.69)</b>        |
| Other or unclassified causes                           |                             |              |                         |                                 |
| Senility                                               | 22 (0, 107)                 | 3            | -19 (-104, 3)           | 0.13 (0.03, ∞)                  |
| Other unclassified causes                              | 1,851 (1,708, 2,005)        | 1,785        | -66 (-220, 77)          | 0.96 (0.89, 1.04)               |
| COVID-19                                               | --                          | 1,186        | 1,186                   | --                              |

UI: Uncertainty interval.

Excess deaths are estimated via the difference between observed deaths during 2020-21 and expected deaths for the same periods based on observations in 2018-19, accounting for projected changes in population size. Excess mortality ratios and expected mortality in the pandemic period are computed via Poisson regression models fitted to pre-pandemic (2018-19) and pandemic period (2020-21) observations, accounting for expected changes in population sizes (**Table S17**) via log offset terms. Bold text indicates totals across rows.

**Table S12: Excess deaths by attributed cause—Deaths occurring in the community during the total pandemic period (1 March, 2020–31 July, 2021).**

| Attributed cause                                       | Predicted (95% UI)          | Observed      | Excess deaths (95% UI)      | Excess mortality ratio (95% UI) |
|--------------------------------------------------------|-----------------------------|---------------|-----------------------------|---------------------------------|
| Infections (other than COVID-19) and maternal diseases |                             |               |                             |                                 |
| Lower respiratory tract infections                     | 148 (89, 239)               | 36            | -112 (-203, -53)            | 0.24 (0.15, 0.41)               |
| Tuberculosis                                           | 18 (9, 35)                  | 29            | 11 (-6, 20)                 | 1.62 (0.82, 3.30)               |
| Diarrhea and gastrointestinal infections               | 42 (15, 102)                | 10            | -32 (-92, -5)               | 0.24 (0.10, 0.68)               |
| Syphilis and other genitourinary diseases              | 21 (10, 42)                 | 23            | 2 (-19, 13)                 | 1.10 (0.55, 2.35)               |
| Other infectious diseases                              | 24 (0, 158)                 | 2             | -22 (-156, 2)               | 0.09 (0.01, ∞)                  |
| Maternal and perinatal diseases                        | 0 (0, 0)                    | 0             | 0 (0, 0)                    | --                              |
| <b>Total</b>                                           | <b>265 (195, 357)</b>       | <b>100</b>    | <b>-165 (-257, -95)</b>     | <b>0.38 (0.28, 0.51)</b>        |
| Noncommunicable diseases                               |                             |               |                             |                                 |
| Cardiovascular/cerebrovascular conditions              | 6,754 (6,510, 7,009)        | 9,701         | 2,947 (2,692, 3,191)        | 1.44 (1.38, 1.49)               |
| Chronic liver disease                                  | 332 (245, 446)              | 98            | -234 (-348, -147)           | 0.30 (0.22, 0.40)               |
| Cancer                                                 | 584 (505, 674)              | 534           | -50 (-140, 29)              | 0.91 (0.79, 1.06)               |
| Diabetes mellitus                                      | 263 (217, 318)              | 362           | 99 (44, 145)                | 1.38 (1.14, 1.67)               |
| Other noncommunicable diseases                         | 314 (172, 545)              | 25            | -289 (-520, -147)           | 0.08 (0.05, 0.15)               |
| <b>Total</b>                                           | <b>8,254 (7,974, 8,543)</b> | <b>10,720</b> | <b>2,466 (2,177, 2,746)</b> | <b>1.30 (1.25, 1.34)</b>        |
| Injuries                                               |                             |               |                             |                                 |
| Unintentional                                          | 209 (162, 267)              | 174           | -35 (-93, 12)               | 0.83 (0.65, 1.08)               |
| Intentional (suicide, homicide)                        | 258 (210, 315)              | 295           | 37 (-20, 85)                | 1.14 (0.94, 1.40)               |
| <b>Total</b>                                           | <b>467 (398, 546)</b>       | <b>469</b>    | <b>2 (-77, 71)</b>          | <b>1.01 (0.86, 1.18)</b>        |
| Other or unclassified causes                           |                             |               |                             |                                 |
| Senility                                               | 397 (345, 457)              | 776           | 379 (319, 431)              | 1.95 (1.70, 2.25)               |
| Other unclassified causes                              | 843 (770, 924)              | 2,019         | 1,176 (1,095, 1,249)        | 2.39 (2.18, 2.62)               |
| COVID-19                                               | --                          | 54            | 54                          | --                              |

UI: Uncertainty interval.

Excess deaths are estimated via the difference between observed deaths during 2020-21 and expected deaths for the same periods based on observations in 2018-19, accounting for projected changes in population size. Excess mortality ratios and expected mortality in the pandemic period are computed via Poisson regression models fitted to pre-pandemic (2018-19) and pandemic period (2020-21) observations, accounting for expected changes in population sizes (**Table S17**) via log offset terms. Bold text indicates totals across rows.

**Table S13: Reported causes of death among individuals with or without documented SARS-CoV-2 infection.**

| Attributed cause                                       | Decedent classification                                           |                                                                      |                                                          |
|--------------------------------------------------------|-------------------------------------------------------------------|----------------------------------------------------------------------|----------------------------------------------------------|
|                                                        | <u>2020-21 decedents<br/>with documented<br/>infection, n (%)</u> | <u>2020-21 decedents<br/>without documented<br/>infection, n (%)</u> | <u>2018-19 reference<br/>period decedents,<br/>n (%)</u> |
|                                                        | N=578                                                             | N=19,426                                                             | N=15,239                                                 |
| Infections (other than COVID-19) and maternal diseases |                                                                   |                                                                      |                                                          |
| Lower respiratory tract infections                     | 5 (0.9)                                                           | 173 (0.9)                                                            | 351 (2.3)                                                |
| Tuberculosis                                           | 0                                                                 | 40 (0.2)                                                             | 48 (0.3)                                                 |
| Diarrhea and gastrointestinal infections               | 0                                                                 | 11 (0.1)                                                             | 45 (0.3)                                                 |
| Syphilis and other genitourinary diseases              | 0                                                                 | 27 (0.1)                                                             | 28 (0.2)                                                 |
| Other infectious diseases                              | 0                                                                 | 2 (<0.1)                                                             | 35 (0.2)                                                 |
| Maternal and perinatal diseases                        | 0                                                                 | 2 (<0.1)                                                             | 9 (0.1)                                                  |
| <b>Total</b>                                           | <b>5 (0.9)</b>                                                    | <b>255 (1.3)</b>                                                     | <b>516 (3.4)</b>                                         |
| Noncommunicable diseases                               |                                                                   |                                                                      |                                                          |
| Cardiovascular/cerebrovascular conditions              | 105 (18.2)                                                        | 11,593 (59.7)                                                        | 8,774 (57.6)                                             |
| Chronic liver disease                                  | 1 (0.2)                                                           | 182 (0.9)                                                            | 452 (3.0)                                                |
| Cancer                                                 | 1 (0.2)                                                           | 806 (4.1)                                                            | 848 (5.6)                                                |
| Diabetes mellitus                                      | 4 (0.7)                                                           | 533 (2.7)                                                            | 434 (2.8)                                                |
| Other noncommunicable diseases                         | 0 (0.0)                                                           | 53 (0.3)                                                             | 344 (2.3)                                                |
| <b>Total</b>                                           | <b>111 (19.2)</b>                                                 | <b>13,167 (67.8)</b>                                                 | <b>10,852 (71.2)</b>                                     |
| Injuries                                               |                                                                   |                                                                      |                                                          |
| Unintentional                                          | 0                                                                 | 342 (1.8)                                                            | 518 (3.4)                                                |
| Intentional (suicide, homicide)                        | 1 (0.2)                                                           | 300 (1.5)                                                            | 263 (1.7)                                                |
| <b>Total</b>                                           | <b>1 (0.2)</b>                                                    | <b>642 (3.3)</b>                                                     | <b>781 (5.1)</b>                                         |
| Other or unclassified causes                           |                                                                   |                                                                      |                                                          |
| Senility                                               | 3 (0.5)                                                           | 776 (4.0)                                                            | 419 (2.7)                                                |
| Other unclassified causes                              | 79 (13.7)                                                         | 3,725 (19.2)                                                         | 2,671 (17.5)                                             |
| COVID-19                                               | 379 (65.6)                                                        | 861 (4.4)                                                            | --                                                       |

UI: Uncertainty interval.

Excess deaths are estimated via the difference between observed deaths during 2020-21 and expected deaths for the same periods based on observations in 2018-19, accounting for projected changes in population size. Excess mortality ratios and expected mortality in the pandemic period are computed via Poisson regression models fitted to pre-pandemic (2018-19) and pandemic period (2020-21) observations, accounting for expected changes in population sizes (**Table S17**) via log offset terms. Bold text indicates totals across rows.

**Table S14: Association of ward-level characteristics with deprivation index.**

| <b>Characteristic</b>                                                    | <b><math>\beta</math> (95% CI)</b> |
|--------------------------------------------------------------------------|------------------------------------|
| Household crowding/density                                               | 0.07 (-0.13, 0.27)                 |
| Proportion of adults illiterate                                          | 0.81 (0.69, 0.93)                  |
| Proportion of households inhabiting dilapidated dwelling structures      | 0.26 (0.07, 0.45)                  |
| Proportion of households inhabiting dwellings with unfinished flooring   | 0.80 (0.68, 0.92)                  |
| Proportion of households without access to tapped, treated water sources | 0.22 (0.03, 0.42)                  |
| Proportion of households without access to onsite water sources          | 0.87 (0.77, 0.97)                  |
| Proportion of households without onsite latrines                         | 0.90 (0.82, 0.98)                  |
| Proportion of households without onsite sewer connections                | 0.80 (0.68, 0.92)                  |
| Proportion of households reliant upon open defecation                    | 0.64 (0.49, 0.80)                  |
| Proportion of households without improved cooking fuel                   | 0.79 (0.67, 0.91)                  |
| Proportion of households lacking bank accounts                           | 0.55 (0.38, 0.71)                  |
| Proportion of households lacking any index assets <sup>1</sup>           | 0.80 (0.69, 0.92)                  |
| Proportion of households inhabiting non-permanent dwelling structures    | 0.75 (0.62, 0.89)                  |
| Proportion of households without electric lighting                       | 0.80 (0.68, 0.92)                  |
| Proportion of population belonging to scheduled castes or tribes         | 0.64 (0.49, 0.80)                  |

CI: Confidence interval.

Values indicate the association (estimated via regression) of each attribute with the first principal component; each measure is centered and scaled to unit variance. The first principal component explained 48.1% of variance across all covariates.

<sup>1</sup>Index assets are defined as radios, televisions, in-home internet access via any device, telephones, bicycles, scooters, or cars; households responding "No" for all assets were considered to lack any index asset.

**Table S15: Association of cause-specific excess deaths with ward-level deprivation index.**

| Attributed cause of death                              |                                             | $\beta$ (95% UI)         |                           |                            |                          |
|--------------------------------------------------------|---------------------------------------------|--------------------------|---------------------------|----------------------------|--------------------------|
|                                                        |                                             | Total period             | Early lockdown            | Wave 1                     | Wave 2                   |
| Infections (other than COVID-19) and maternal diseases | Lower respiratory tract infections          | 0.19 (-0.05, 0.42)       | --                        | 0.22 (-0.52, 1.15)         | 1.04 (-0.13, 2.64)       |
|                                                        | <b>All infections and maternal diseases</b> | 0.25 (0.02, 0.48)        | 0.08 (-1.16, 1.36)        | 0.17 (-0.22, 0.65)         | 0.81 (0.06, 1.83)        |
| Noncommunicable diseases                               | Cardiovascular/cerebrovascular conditions   | 0.04 (-0.01, 0.09)       | 0.11 (-0.02, 0.23)        | -0.06 (-0.15, 0.04)        | 0.06 (-0.03, 0.16)       |
|                                                        | Chronic liver disease                       | 0.10 (-0.06, 0.25)       | 0.03 (-0.71, 1.04)        | 0.01 (-0.39, 0.47)         | -0.04 (-0.73, 0.46)      |
|                                                        | Cancer                                      | 0.01 (-0.15, 0.16)       | -0.54 (-1.35, 0.22)       | -0.08 (-0.35, 0.22)        | 0.07 (-0.21, 0.36)       |
|                                                        | Diabetes mellitus                           | -0.02 (-0.28, 0.24)      | -0.36 (-1.10, 0.29)       | -0.14 (-0.78, 0.37)        | 0.33 (-0.17, 0.78)       |
|                                                        | <b>All noncommunicable diseases</b>         | <b>0.06 (0.02, 0.10)</b> | <b>0.06 (-0.04, 0.16)</b> | <b>-0.03 (-0.12, 0.05)</b> | <b>0.11 (0.03, 0.19)</b> |
| Injuries                                               | Unintentional                               | 0.00 (-0.16, 0.17)       | 0.08 (-0.63, 0.53)        | 0.03 (-0.51, 0.46)         | 0.02 (-0.28, 0.26)       |
|                                                        | Intentional (suicide, homicide)             | 0.02 (-0.20, 0.32)       | 0.02 (-0.59, 0.72)        | -0.03 (-0.51, 0.44)        | -0.04 (-0.51, 0.43)      |
|                                                        | <b>Total</b>                                | -0.01 (-0.16, 0.15)      | 0.06 (-0.20, 0.36)        | 0.01 (-0.32, 0.33)         | 0.01 (-0.21, 0.22)       |

UI: Uncertainty interval.

Excess deaths are estimated via the difference between observed deaths during 2020-21 and expected deaths for the same periods based on observations in 2018-19, accounting for projected changes in population size. Excess mortality ratios and expected mortality in the pandemic period are computed via Poisson regression models fitted to pre-pandemic (2018-19) and pandemic period (2020-21) observations, accounting for expected changes in population sizes (**Table S17**) via log offset terms. Bold text indicates totals across rows.



**Table S16: Association of the proportion of excess deaths attributed to COVID-19 with ward-level deprivation index.**

| Measure of COVID-19 associated mortality                                    | $\beta$ (95% UI)      |                     |                    |                     |
|-----------------------------------------------------------------------------|-----------------------|---------------------|--------------------|---------------------|
|                                                                             | <i>Early lockdown</i> | <i>Wave 1</i>       | <i>Wave 2</i>      | <i>Total period</i> |
| Deaths among confirmed COVID-19 cases, as a proportion of all excess deaths | --                    | -0.12 (-2.92, 2.23) | 0.01 (-0.60, 0.71) | 0.13 (-2.06, 2.30)  |
| Deaths attributed to COVID-19, as a proportion of all excess deaths         | --                    | -0.19 (-5.10, 4.11) | 0.02 (-1.22, 1.42) | 0.32 (-5.37, 5.61)  |

UI: Uncertainty interval.

Excess deaths are estimated via the difference between observed deaths during 2020-21 and expected deaths for the same periods based on observations in 2018-19, accounting for projected changes in population size (**Table S17**).

**Table S17: Data elements of the medical certificate of cause of death for hospitalized patients (Form 4) and non-institutional deaths (Form 4A).**

| Element                                                                                                                                                                        | Sub-items                                                                                                                                                                                                                                                                                                                                                                                                                                                                                                                    |
|--------------------------------------------------------------------------------------------------------------------------------------------------------------------------------|------------------------------------------------------------------------------------------------------------------------------------------------------------------------------------------------------------------------------------------------------------------------------------------------------------------------------------------------------------------------------------------------------------------------------------------------------------------------------------------------------------------------------|
| Name of deceased<br>Sex                                                                                                                                                        |                                                                                                                                                                                                                                                                                                                                                                                                                                                                                                                              |
| Age at death                                                                                                                                                                   | In completed years<br>In completed months (if <1 year of age)<br>In days (if <1 month)<br>In hours (if <1 day)                                                                                                                                                                                                                                                                                                                                                                                                               |
| Cause of death                                                                                                                                                                 | Interval between onset and death, approximate<br>Immediate cause—disease, injury, or complication which caused death, not the mode of dying such as heart failure, asthenia, etc.<br>Antecedent cause—morbid conditions, if any, giving rise to the above cause, stating underlying condition last<br>Other significant conditions contributing to the death but not related to the disease or conditions causing<br>If the deceased was a female, was the death associated with pregnancy?<br>If yes, was there a delivery? |
| Name and signature of the medical attendant certifying the cause of death<br>Date of certificate<br>Address of medical practitioner/medical attendant with registration number |                                                                                                                                                                                                                                                                                                                                                                                                                                                                                                                              |

**Table S18: Data elements of the death registration form.**

| <u>Element</u>                           |
|------------------------------------------|
| Name of the deceased                     |
| Sex                                      |
| Date of birth                            |
| Name of spouse or parent                 |
| Address of death                         |
| Date of death                            |
| Residential address on the date of death |
| <u>Ward number</u>                       |

**Table S19: Expected annual rates of change in age- and sex-specific population sizes.**

| Age group      | Fold change   |               |
|----------------|---------------|---------------|
|                | Males         | Females       |
| 0-9 years      | 0.9925        | 0.9938        |
| 10-19 years    | 0.9945        | 0.9948        |
| 20-29 years    | 1.0068        | 1.0041        |
| 30-39 years    | 1.0072        | 1.0049        |
| 40-49 years    | 1.0125        | 1.0108        |
| 50-59 years    | 1.0266        | 1.0274        |
| 60-69 years    | 1.0289        | 1.0310        |
| 70-79 years    | 1.0310        | 1.0318        |
| ≥80 years      | 1.0445        | 1.0473        |
| <b>Overall</b> | <b>1.0089</b> | <b>1.0091</b> |

Annual fold in population sizes by age- and sex-specific strata are obtained for Madurai District from the US Census Bureau (available from: <https://www.census.gov/geographies/mapping-files/time-series/demo/international-programs/subnationalpopulation.html>; accessed 22 March, 2023). Bold text indicates totals across rows.

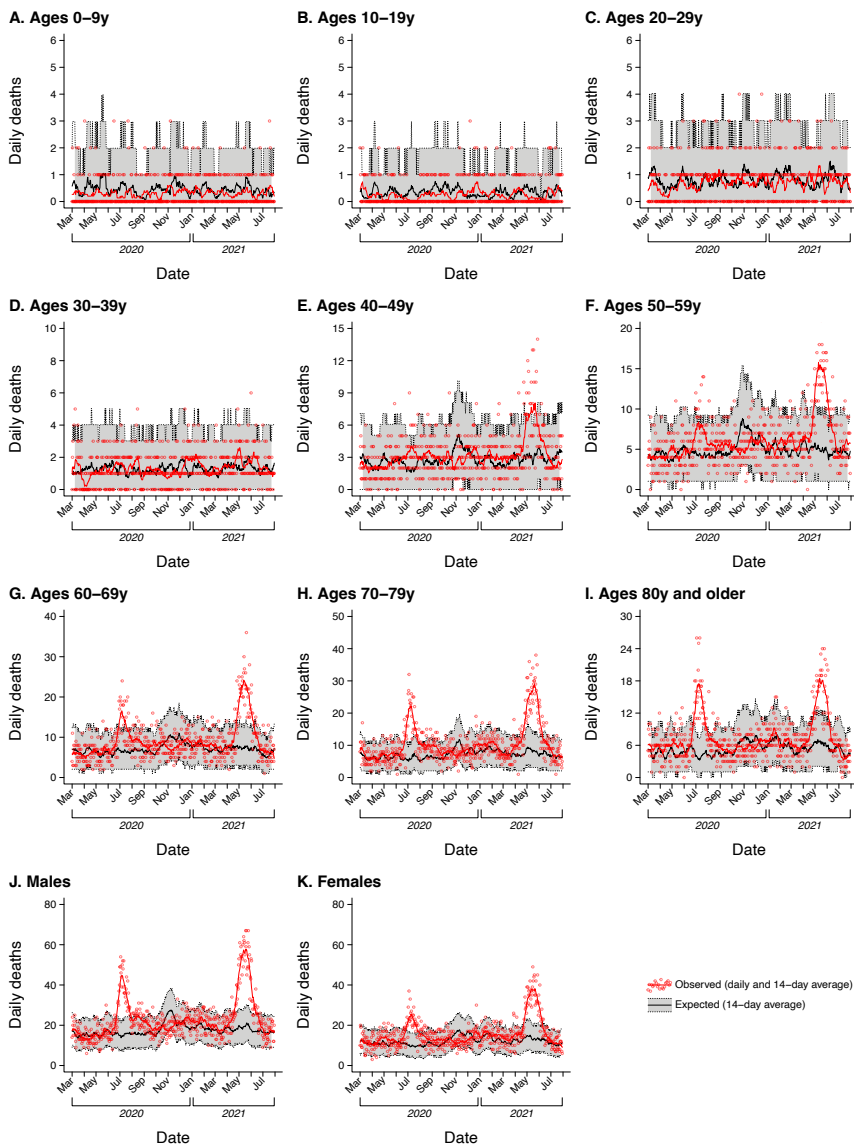

**Figure S1: Observed and expected mortality across age- and sex-specific strata.** We plot observed and expected deaths during the analysis period of March, 2020 to July, 2021, across age-specific (a-i) and sex-specific strata (j, k). We present observed deaths as red points with accompanying red lines indicating 14-day moving average values. Expected deaths (sampled via Poisson distributions fitted with 2 week moving-average mortality rates from 2018-19, accounting for changes in population size [Table S17]) are presented as black lines (median estimates) along with 95% uncertainty intervals (grey shading).

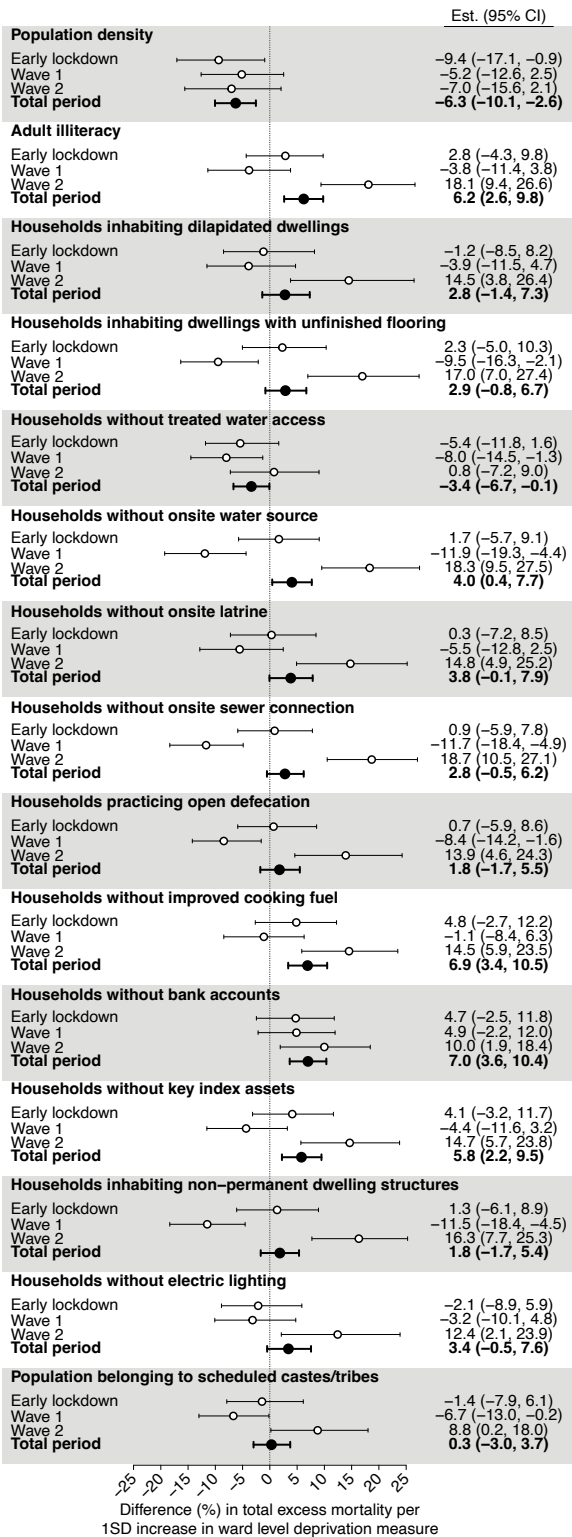

**Figure S2: Association of excess deaths with specific ward-level deprivation indicators.** We illustrate estimates of the association between excess deaths and a ward-level measure of community deprivation, as measured in the 2011 Census of India and used to construct the principal component measuring community socioeconomic deprivation for primary analyses (Figure 3). Values correspond to the absolute difference (in percentage-point units) in excess mortality, measured relative to expected deaths, associated with an increase by one standard deviation in the principal component-based measure of community deprivation. Lines denote 95% uncertainty intervals surrounding point estimates (medians), as estimated across regression models fitted across 10,000 independent draws from the distribution of the excess mortality outcome variable
